# Supplementary material for: Ganoderma Lucidum Triterpenoids Improve Maternal Separation-Induced Anxiety- and Depression-like Behaviors in Mice by Mitigating Inflammation in the Periphery and Brain
Source: MDPI journal article supplement (doi:10.3390/nu14112268), 2022-05-28
Supplement: s1 [file s1]

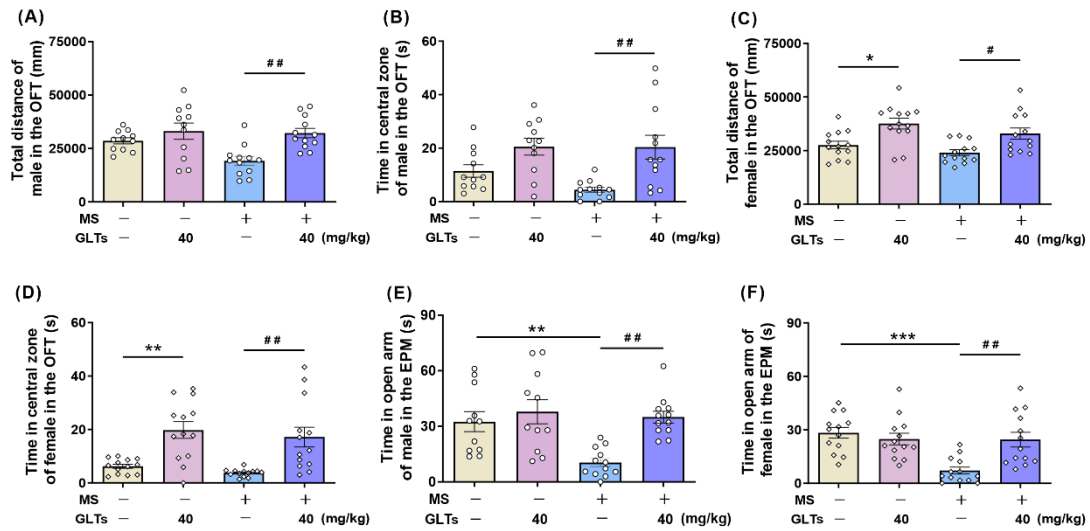

**Figure S1.** The similar effects of maternal separation and GLTs treatment on the anxiety-like behaviors of the male and female mice. **(A)** Total distance and **(B)** time spent in the central zone of the OFT in male mice. **(C)** Total distance and **(D)** time spent in the central zone of the OFT in female mice. **(E)** Time spent in the open arm of the EPM test in male mice. **(F)** Time spent in the open arm of the EPM test in male mice. Data are expressed as mean  $\pm$  SEM. Number of male mice: Control + vehicle,  $n = 11$ ; Control + GLTs (40 mg/kg),  $n = 11$ ; MS + vehicle,  $n = 12$ ; MS + GLTs (40 mg/kg),  $n = 12$ . Number of female mice:  $n = 13$  / group. \*  $p < 0.05$ , \*\*  $p < 0.01$ , \*\*\*  $p < 0.001$ , as compared with Control + vehicle group; #  $p < 0.05$ , ##  $p < 0.01$ , as compared with MS + vehicle.

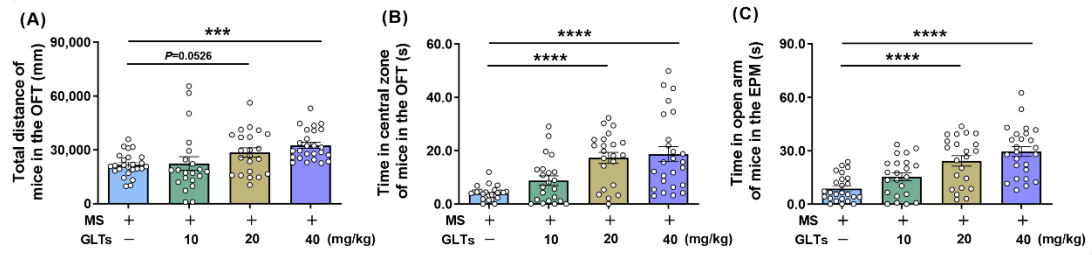

**Figure S2.** Effects of different doses of GLTs on anxiety-like behaviors of MS mice. **(A)** Total distance and **(B)** time spent in the central zone of the OFT. **(C)** Time spent in the open arm of the EPM. Data are expressed as mean  $\pm$  SEM. Number of male mice: Control + vehicle,  $n = 25$ ; MS + GLTs (10 mg/kg),  $n = 22$ ; MS + GLTs (20 mg/kg),  $n = 22$ ; MS + GLTs (40 mg/kg),  $n = 25$ .  $*** p < 0.001$ ,  $**** p < 0.0001$ , as compared with MS + vehicle.

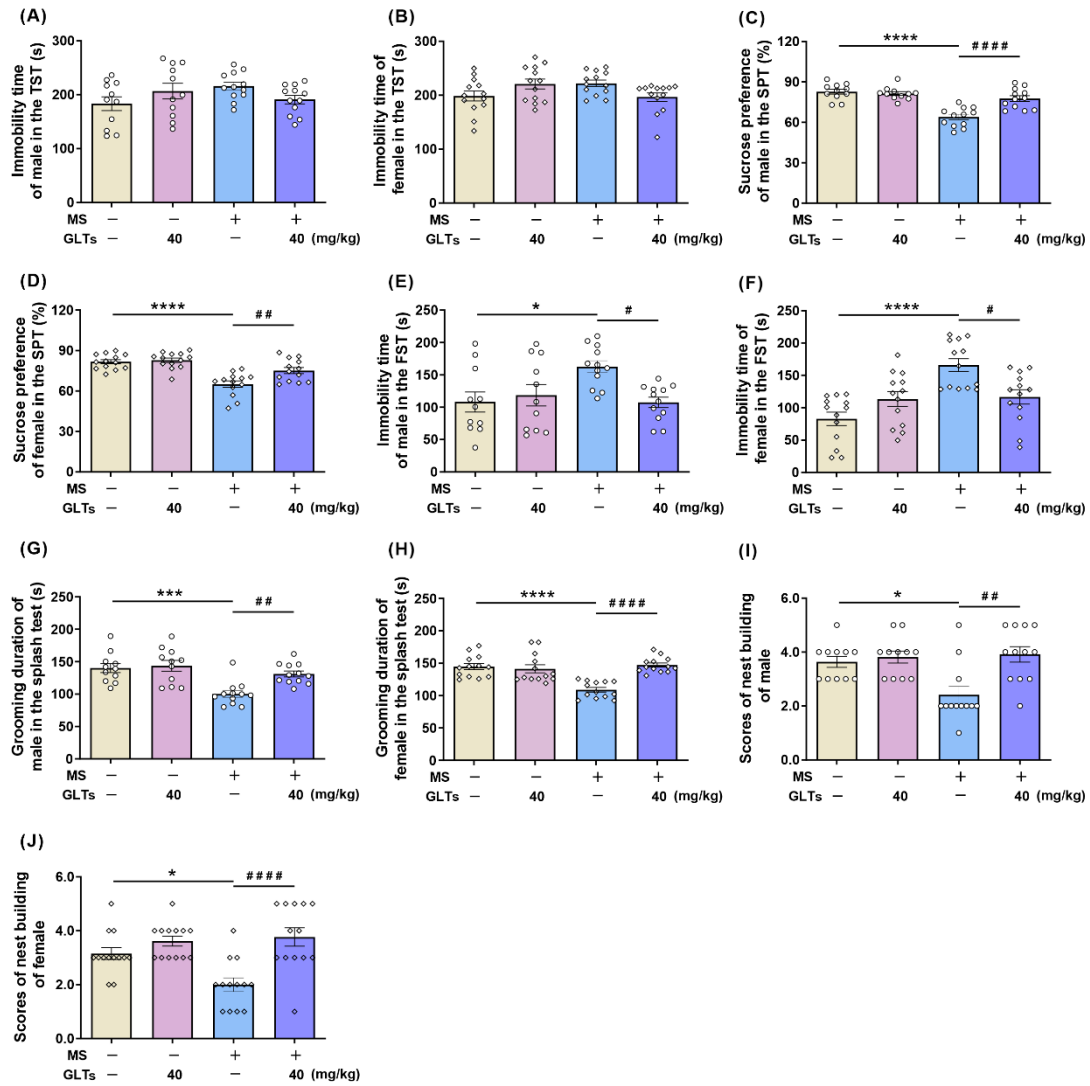

**Figure S3.** Similar effects of maternal separation and GLTs treatment on the depression-like behaviors in male and female mice. **(A)** Sucrose preference of male mice in the SPT. **(B)** Sucrose preference of female mice in the SPT. **(C)** Immobility time of male mice in the FST. **(D)** Immobility time of female mice in the FST. **(E)** Immobility time of male mice in the TST. **(F)** Immobility time of female mice in the TST. **(G)** Grooming duration of male mice in the splash test. **(H)** Grooming duration of female mice in the splash test. **(I)** Nest-building scores of male mice in the nest building test. **(J)** Nest-building scores of female mice in the nest building test. Data are expressed as mean  $\pm$  SEM. Number of male mice: Control + vehicle,  $n = 11$ ; Control + GLTs (40 mg/kg),  $n = 11$ ; MS + vehicle,  $n = 12$ ; MS + GLTs (40 mg/kg),  $n = 12$ . Number of female mice:  $n = 13$  / group. \*  $p < 0.05$ , \*\*  $p < 0.01$ , \*\*\*  $p < 0.001$ , \*\*\*\*  $p < 0.0001$ , as compared with Control + vehicle group; #  $p < 0.05$ , ##  $p < 0.01$ , ###  $p < 0.001$ , ####  $p < 0.0001$ , as compared with MS + vehicle.

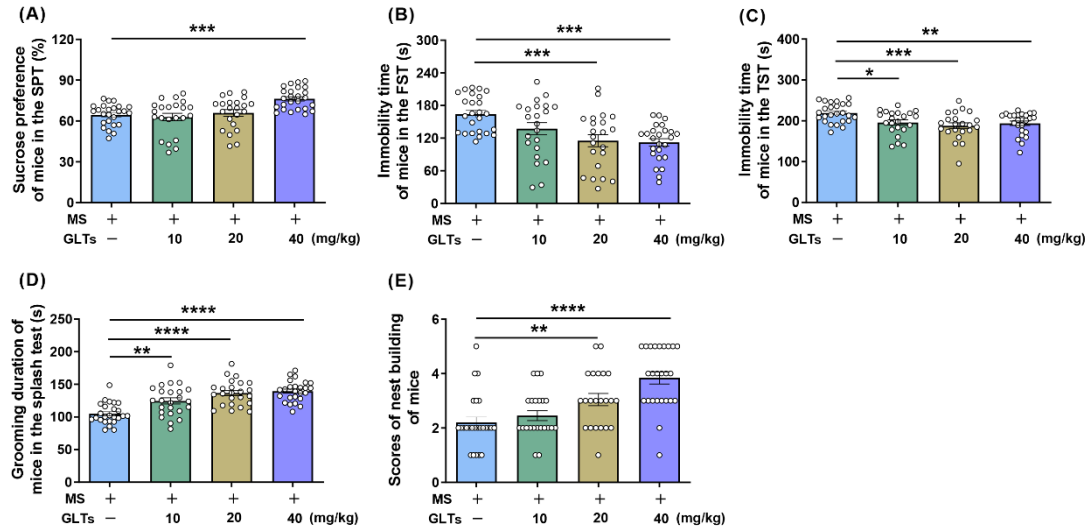

**Figure S4.** Effects of different doses of GLTs on depression-like behaviors in MS mice. **(A)** Sucrose preference of mice in the SPT. **(B)** Immobility time of mice in the FST. **(C)** Immobility time of mice in the TST. **(D)** Grooming duration of mice in the splash test. **(E)** Nest-building scores of mice in the nest building test. Data are expressed as mean  $\pm$  SEM. Number of male mice: Control + vehicle,  $n = 25$ ; MS + GLTs (10 mg/kg),  $n = 22$ ; MS + GLTs (20 mg/kg),  $n = 22$ ; MS + GLTs (40 mg/kg),  $n = 25$ . \*  $p < 0.05$ , \*\*  $p < 0.01$ , \*\*\*  $p < 0.001$ , \*\*\*\*  $p < 0.0001$ , as compared with MS + vehicle.
